# Supplementary material for: Evaluation of AUTION EYE AI-4510 flow cell morphology analyzer for counting particles in urine
Source: publisher site journal article supplement (doi:10.1515/cclm-2024-1163), 2025-01-28
Supplement: Supplementary file 4 [file j_cclm-2024-1163_suppl_002.docx]

**Evaluation of AUTION EYE AI-4510 cell morphology analyzer for counting urinary particles**

Matthijs Oyaert1,#, Timo Kouri2,3, Eva Carton1, Sigrid Deprez1, Stijn Lambrecht1, Marijn Speeckaert4,5
1Department of Laboratory medicine, Ghent University Hospital, Ghent, Belgium
2Department of Clinical Chemistry, HUSLAB, Helsinki University Hospital, HUS Diagnostic Center, FIN-00029 HUS, Helsinki, Finland
3Department of Clinical Chemistry, University of Helsinki, Finland.
4Department of Nephrology, Ghent University Hospital, 9000 Ghent, Belgium
5Research Foundation Flanders, 1000 Brussels, Belgium

**Table 2S.** Detection of red blood cells (RBC) in urine by AUTION EYE AI-4510 against visual microscopy. Statistical uncertainty zone (11-100 ×106/L) is marked with **bold face**.

|  | **AUTION EYE AI-4510** | | | | | | | | | | | | |
| --- | --- | --- | --- | --- | --- | --- | --- | --- | --- | --- | --- | --- | --- |
| **VISUAL** | Categories (particles ×106/L) | | | | | | | | | | | | |
| Categories (particles ×106/L) | 0-10 | | 11-30 | | | 31-100 | 101-300 | | 301-1000 | | | >1000 | **Total** |
| 0-10 | 327 | | **92** | | | **4** | 1 | | *0* | | | *0* | *424* |
| 11-30 | **54** | | **188** | | | **35** | 0 | | *0* | | | *0* | *277* |
| 31-100 | **0** | | **14** | | | **132** | 19 | | *0* | | | *0* | *165* |
| 101-300 | 1 | | 0 | | | 2 | 56 | | *6* | | | *0* | *65* |
| 301-1000 | 0 | | 0 | | | 0 | 2 | | *43* | | | *6* | *51* |
| >1000 | 0 | | 0 | | | 0 | 0 | | *0* | | | *30* | *30* |
| **Total** | *382* | | *294* | | | *173* | *78* | | *49* | | | *36* | *1012* |
| **Agreement at diagonal** | | 76.7% | | | | | | | |
| Agreement, diagonal ±1 category | | | | 99.4% | | | |
| Cohen’s kappa (weighted) | | | | 0.93 | | | |
| **Accuracy of diagnostic classification** | | | | |  | | | | | |  | | | |
| Limit of positivity | 10 | | | | | | | | 30 | | | | |
| Sensitivity (95%CI) | 90.7% (95%CI: 88.0 – 92.9%) | | | | | | | | 95.2% (95%CI: 92.2 – 97.3%) | | | | |
| Specificity (95%CI) | 77.1% (95%CI: 72.8 – 81.0%) | | | | | | | | 94.3% (95%CI: 92.3 – 95.9%) | | | | |
